# Supplementary material
Source: MDPI journal article supplement (https://www.mdpi.com/2304-6740/9/2/9)

# checkCIF/PLATON report

Structure factors have been supplied for datablock(s) shelx

THIS REPORT IS FOR GUIDANCE ONLY. IF USED AS PART OF A REVIEW PROCEDURE FOR PUBLICATION, IT SHOULD NOT REPLACE THE EXPERTISE OF AN EXPERIENCED CRYSTALLOGRAPHIC REFEREE.

No syntax errors found.      CIF dictionary      Interpreting this report

## Datablock: shelx

---

Bond precision:    C-C = 0.0053 Å                      Wavelength=1.54184

Cell:                a=9.3380(5)                b=9.6015(5)                c=11.3991(7)  
                      alpha=97.334(5)        beta=104.595(5)        gamma=116.924(5)  
Temperature:        293 K

|                | Calculated               | Reported           |
|----------------|--------------------------|--------------------|
| Volume         | 846.52(10)               | 846.52(9)          |
| Space group    | P -1                     | P -1               |
| Hall group     | -P 1                     | -P 1               |
| Moiety formula | C13 H13 Cu N3 O7 S, H2 O | ?                  |
| Sum formula    | C13 H15 Cu N3 O8 S       | C13 H15 Cu N3 O8 S |
| Mr             | 436.89                   | 436.88             |
| Dx,g cm-3      | 1.714                    | 1.714              |
| Z              | 2                        | 2                  |
| Mu (mm-1)      | 3.442                    | 3.442              |
| F000           | 446.0                    | 446.0              |
| F000'          | 444.10                   |                    |
| h,k,lmax       | 11,11,14                 | 11,11,14           |
| Nref           | 3355                     | 3335               |
| Tmin,Tmax      | 0.516,0.653              | 0.894,1.000        |
| Tmin'          | 0.334                    |                    |

Correction method= # Reported T Limits: Tmin=0.894 Tmax=1.000  
AbsCorr = MULTI-SCAN

Data completeness= 0.994                      Theta(max)= 72.408

R(reflections)= 0.0449( 2989)                wR2(reflections)= 0.1323( 3335)

S = 1.047                                          Npar= 252

---

The following ALERTS were generated. Each ALERT has the format  
**test-name\_ALERT\_alert-type\_alert-level**.  
Click on the hyperlinks for more details of the test.

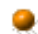

#### Alert level B

PLAT230\_ALERT\_2\_B Hirshfeld Test Diff for C10 --C11 . 9.0 s.u.

**Author Response: mainly due to rotational disorder of the thiophene group around the linking C-C bond**

PLAT241\_ALERT\_2\_B High 'MainMol' Ueq as Compared to Neighbors of 031 Check

**Author Response: mainly due to librational disorder of nitrate NO3 group around the N-atom**

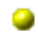

#### Alert level C

PLAT230\_ALERT\_2\_C Hirshfeld Test Diff for S --C9 . 6.2 s.u.

**Author Response: mainly due to rotational disorder of the thiophene group around the linking C-C bond**

PLAT241\_ALERT\_2\_C High 'MainMol' Ueq as Compared to Neighbors of S Check

**Author Response: mainly due to librational disorder of nitrate NO3 group around the N-atom**

PLAT242\_ALERT\_2\_C Low 'MainMol' Ueq as Compared to Neighbors of Cu Check  
PLAT242\_ALERT\_2\_C Low 'MainMol' Ueq as Compared to Neighbors of N3 Check  
PLAT242\_ALERT\_2\_C Low 'MainMol' Ueq as Compared to Neighbors of C9 Check  
PLAT480\_ALERT\_4\_C Long H...A H-Bond Reported H2B ..N3 . 2.65 Ang.

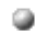

#### Alert level G

PLAT002\_ALERT\_2\_G Number of Distance or Angle Restraints on AtSite 6 Note  
PLAT007\_ALERT\_5\_G Number of Unrefined Donor-H Atoms ..... 1 Report  
PLAT154\_ALERT\_1\_G The s.u.'s on the Cell Angles are Equal ..(Note) 0.005 Degree  
PLAT172\_ALERT\_4\_G The CIF-Embedded .res File Contains DFIX Records 4 Report  
PLAT199\_ALERT\_1\_G Reported \_cell\_measurement\_temperature ..... (K) 293 Check  
PLAT200\_ALERT\_1\_G Reported \_diffrn\_ambient\_temperature ..... (K) 293 Check  
PLAT794\_ALERT\_5\_G Tentative Bond Valency for Cu (II) . 2.25 Info  
PLAT802\_ALERT\_4\_G CIF Input Record(s) with more than 80 Characters 1 Info  
PLAT860\_ALERT\_3\_G Number of Least-Squares Restraints ..... 6 Note  
PLAT912\_ALERT\_4\_G Missing # of FCF Reflections Above STh/L= 0.600 20 Note  
PLAT941\_ALERT\_3\_G Average HKL Measurement Multiplicity ..... 2.2 Low  
PLAT965\_ALERT\_2\_G The SHELXL WEIGHT Optimisation has not Converged Please Check  
PLAT978\_ALERT\_2\_G Number C-C Bonds with Positive Residual Density. 2 Info

- 0 **ALERT level A** = Most likely a serious problem - resolve or explain  
2 **ALERT level B** = A potentially serious problem, consider carefully  
6 **ALERT level C** = Check. Ensure it is not caused by an omission or oversight  
13 **ALERT level G** = General information/check it is not something unexpected

3 ALERT type 1 CIF construction/syntax error, inconsistent or missing data  
10 ALERT type 2 Indicator that the structure model may be wrong or deficient  
2 ALERT type 3 Indicator that the structure quality may be low  
4 ALERT type 4 Improvement, methodology, query or suggestion  
2 ALERT type 5 Informative message, check

---

It is advisable to attempt to resolve as many as possible of the alerts in all categories. Often the minor alerts point to easily fixed oversights, errors and omissions in your CIF or refinement strategy, so attention to these fine details can be worthwhile. In order to resolve some of the more serious problems it may be necessary to carry out additional measurements or structure refinements. However, the purpose of your study may justify the reported deviations and the more serious of these should normally be commented upon in the discussion or experimental section of a paper or in the "special\_details" fields of the CIF. checkCIF was carefully designed to identify outliers and unusual parameters, but every test has its limitations and alerts that are not important in a particular case may appear. Conversely, the absence of alerts does not guarantee there are no aspects of the results needing attention. It is up to the individual to critically assess their own results and, if necessary, seek expert advice.

### **Publication of your CIF in IUCr journals**

A basic structural check has been run on your CIF. These basic checks will be run on all CIFs submitted for publication in IUCr journals (*Acta Crystallographica*, *Journal of Applied Crystallography*, *Journal of Synchrotron Radiation*); however, if you intend to submit to *Acta Crystallographica Section C* or *E* or *IUCrData*, you should make sure that full publication checks are run on the final version of your CIF prior to submission.

### **Publication of your CIF in other journals**

Please refer to the *Notes for Authors* of the relevant journal for any special instructions relating to CIF submission.

---

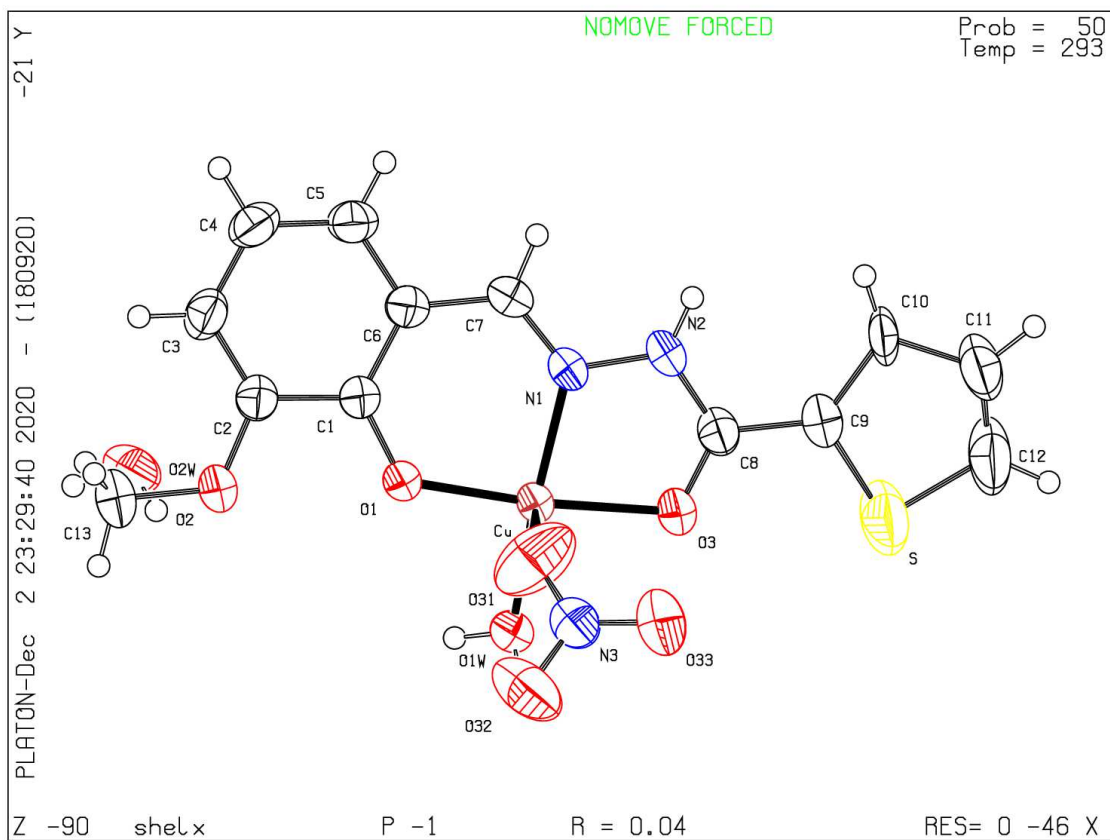

Supplement: s1 [file s1]
