# Supplementary material
Source: MDPI journal article supplement (https://www.mdpi.com/2304-6740/9/2/9)
Supplement: s1 [file s1]

# Supplementary Materials: Synthesis, Crystal Structure, Spectroscopic Characterization, DFT Calculations and Cytotoxicity Assays of a New Cu(II) Complex with an Acylhydrazone Ligand Derived from Thiophene

María R. Rodríguez, Lucía M. Balsa, Oscar E. Piro, Gustavo A. Etcheverría, Javier García-Tojal, Reinaldo Pis-Diez, Ignacio E. León, Beatriz P. Parajón-Costa and Ana C. González-Baró

**Table S1.** Hydrogen bonds for CuHL [ $\text{\AA}$  and  $^\circ$ ].

| D-H...A               | d(D-H)  | d(H...A) | d(D...A) | <(DHA) |
|-----------------------|---------|----------|----------|--------|
| C(7)-H(7)...O(32)#1   | 0.93    | 2.53     | 3.367(4) | 150    |
| C(10)-H(10)...O(2W)#2 | 0.93    | 2.53     | 3.331(5) | 145    |
| N(2)-H(2)...O(2W)#2   | 0.86    | 1.87     | 2.714(4) | 167    |
| O(1W)-H(1A)...N(3)#3  | 0.85(1) | 2.61(1)  | 3.459(4) | 177(4) |
| O(1W)-H(1A)...O(31)#3 | 0.85(1) | 2.20(2)  | 2.984(5) | 153(3) |
| O(1W)-H(1A)...O(32)#3 | 0.85(1) | 2.32(2)  | 3.098(5) | 152(3) |
| O(1W)-H(1B)...O(1)#3  | 0.86(1) | 2.11(3)  | 2.842(3) | 143(3) |
| O(1W)-H(1B)...O(2)#3  | 0.86(1) | 2.25(3)  | 2.974(3) | 142(4) |
| O(2W)-H(2A)...O(33)#4 | 0.85(1) | 1.97(2)  | 2.748(4) | 152(4) |
| O(2W)-H(2B)...N(3)#3  | 0.86(1) | 2.65(2)  | 3.445(4) | 155(5) |
| O(2W)-H(2B)...O(32)#3 | 0.86(1) | 2.54(3)  | 3.197(5) | 134(4) |
| O(2W)-H(2B)...O(33)#3 | 0.86(1) | 2.06(3)  | 2.838(5) | 150(5) |

Symmetry transformations used to generate equivalent atoms: (#1)  $x+1, y, z$ ; (#2)  $-x+2, -y+2, -z+1$ ; (#3)  $-x+1, -y+2, -z+1$ ; (#4)  $x, y, z-1$ .

**Table S2.** Experimental bond distances of CuHL.

| Atom 1 | Atom 2 | Distance ( $\text{\AA}$ ) | Atom 1 | Atom 2 | Distance ( $\text{\AA}$ ) | Atom 1 | Atom 2 | Distance ( $\text{\AA}$ ) |
|--------|--------|---------------------------|--------|--------|---------------------------|--------|--------|---------------------------|
| C1     | C2     | 1.429(4)                  | C9     | C8     | 1.453(5)                  | N1     | N2     | 1.376(4)                  |
| C2     | C1     | 1.429(4)                  | C8     | N2     | 1.342(4)                  | N2     | N1     | 1.376(4)                  |
| C1     | C6     | 1.417(4)                  | N2     | C8     | 1.342(4)                  | N1     | Cu     | 1.927(2)                  |
| C6     | C1     | 1.417(4)                  | C8     | O3     | 1.258(4)                  | Cu     | N1     | 1.927(2)                  |
| C1     | O1     | 1.311(3)                  | O3     | C8     | 1.258(4)                  | N2     | H2     | 0.86                      |
| O1     | C1     | 1.311(3)                  | C9     | C10    | 1.467(5)                  | H2     | N2     | 0.86                      |
| C2     | C3     | 1.371(5)                  | C10    | C9     | 1.467(5)                  | N3     | O31    | 1.217(7)                  |
| C3     | C2     | 1.371(5)                  | C9     | S      | 1.694(3)                  | O31    | N3     | 1.217(7)                  |
| C2     | O2     | 1.365(4)                  | S      | C9     | 1.694(3)                  | N3     | O32    | 1.212(6)                  |
| O2     | C2     | 1.365(4)                  | C10    | H10    | 0.93                      | O32    | N3     | 1.212(6)                  |
| C3     | H3     | 0.93                      | H10    | C10    | 0.93                      | N3     | O33    | 1.217(6)                  |
| H3     | C3     | 0.93                      | C10    | C11    | 1.448(6)                  | O33    | N3     | 1.217(6)                  |
| C3     | C4     | 1.403(5)                  | C11    | C10    | 1.448(6)                  | O1     | Cu     | 1.885(3)                  |
| C4     | C3     | 1.403(5)                  | C11    | H11    | 0.93                      | Cu     | O1     | 1.885(3)                  |
| C4     | H4     | 0.929                     | H11    | C11    | 0.93                      | O1W    | H1A    | 0.85(3)                   |
| H4     | C4     | 0.929                     | C11    | C12    | 1.311(7)                  | H1A    | O1W    | 0.85(3)                   |
| C4     | C5     | 1.369(5)                  | C12    | C11    | 1.311(7)                  | O1W    | H1B    | 0.85(6)                   |
| C5     | C4     | 1.369(5)                  | C12    | H12    | 0.93                      | H1B    | O1W    | 0.85(6)                   |
| C5     | H5     | 0.93                      | H12    | C12    | 0.93                      | O1W    | Cu     | 1.953(2)                  |

|    |    |          |      |      |          |     |     |          |
|----|----|----------|------|------|----------|-----|-----|----------|
| H5 | C5 | 0.93     | C12  | S    | 1.689(6) | Cu  | O1W | 1.953(2) |
| C5 | C6 | 1.408(4) | S    | C12  | 1.689(6) | O3  | Cu  | 1.978(3) |
| C6 | C5 | 1.408(4) | C13  | H13A | 0.96     | Cu  | O3  | 1.978(3) |
| C6 | C7 | 1.430(5) | H13A | C13  | 0.96     | O31 | Cu  | 2.429(5) |
| C7 | C6 | 1.430(5) | C13  | H13B | 0.96     | Cu  | O31 | 2.429(5) |
| C7 | H7 | 0.93     | H13B | C13  | 0.96     | O2W | H2A | 0.85(5)  |
| H7 | C7 | 0.93     | C13  | H13C | 0.96     | H2A | O2W | 0.85(5)  |
| C7 | N1 | 1.290(4) | H13C | C13  | 0.96     | O2W | H2B | 0.85(6)  |
| N1 | C7 | 1.290(4) | C13  | O2   | 1.420(5) | H2B | O2W | 0.85(6)  |
| C8 | C9 | 1.453(5) | O2   | C13  | 1.420(5) |     |     |          |

Table S3. Experimental bond angles of CuHL.

| Atom 1 | Atom 2 | Atom 3 | Angle (°) | Atom 1 | Atom 2 | Atom 3 | Angle (°) | Atom 1 | Atom 2 | Atom 3 | Angle (°) |
|--------|--------|--------|-----------|--------|--------|--------|-----------|--------|--------|--------|-----------|
| C2     | C1     | C6     | 117.3(3)  | C3     | C4     | C5     | 119.7(3)  | H7     | C7     | N1     | 118.4     |
| C6     | C1     | C2     | 117.3(3)  | C5     | C4     | C3     | 119.7(3)  | N1     | C7     | H7     | 118.4     |
| C2     | C1     | O1     | 117.1(3)  | H4     | C4     | C5     | 120.1     | C9     | C8     | N2     | 118.6(3)  |
| O1     | C1     | C2     | 117.1(3)  | C5     | C4     | H4     | 120.1     | N2     | C8     | C9     | 118.6(3)  |
| C6     | C1     | O1     | 125.5(3)  | C4     | C5     | H5     | 119.3     | C9     | C8     | O3     | 121.3(3)  |
| O1     | C1     | C6     | 125.5(3)  | H5     | C5     | C4     | 119.3     | O3     | C8     | C9     | 121.3(3)  |
| C1     | C2     | C3     | 121.5(3)  | C4     | C5     | C6     | 121.4(3)  | N2     | C8     | O3     | 120.1(3)  |
| C3     | C2     | C1     | 121.5(3)  | C6     | C5     | C4     | 121.4(3)  | O3     | C8     | N2     | 120.1(3)  |
| C1     | C2     | O2     | 112.9(3)  | H5     | C5     | C6     | 119.3     | C8     | C9     | C10    | 129.0(3)  |
| O2     | C2     | C1     | 112.9(3)  | C6     | C5     | H5     | 119.3     | C10    | C9     | C8     | 129.0(3)  |
| C3     | C2     | O2     | 125.6(3)  | C1     | C6     | C5     | 119.8(3)  | C8     | C9     | S      | 117.4(3)  |
| O2     | C2     | C3     | 125.6(3)  | C5     | C6     | C1     | 119.8(3)  | S      | C9     | C8     | 117.4(3)  |
| C2     | C3     | H3     | 119.9     | C1     | C6     | C7     | 122.7(3)  | C10    | C9     | S      | 113.5(3)  |
| H3     | C3     | C2     | 119.9     | C7     | C6     | C1     | 122.7(3)  | S      | C9     | C10    | 113.5(3)  |
| C2     | C3     | C4     | 120.3(3)  | C5     | C6     | C7     | 117.5(3)  | C9     | C10    | H10    | 127.5     |
| C4     | C3     | C2     | 120.3(3)  | C7     | C6     | C5     | 117.5(3)  | H10    | C10    | C9     | 127.5     |
| H3     | C3     | C4     | 119.8     | C6     | C7     | H7     | 118.3     | C9     | C10    | C11    | 104.9(4)  |
| C4     | C3     | H3     | 119.8     | H7     | C7     | C6     | 118.3     | C11    | C10    | C9     | 104.9(4)  |
| C3     | C4     | H4     | 120.2     | C6     | C7     | N1     | 123.3(3)  | H10    | C10    | C11    | 127.5     |
| H4     | C4     | C3     | 120.2     | N1     | C7     | C6     | 123.3(3)  | C11    | C10    | H10    | 127.5     |
| C10    | C11    | H11    | 121.8     | Cu     | N1     | C7     | 128.3(2)  | N3     | O31    | Cu     | 136.4(4)  |
| H11    | C11    | C10    | 121.8     | N2     | N1     | Cu     | 111.7(2)  | Cu     | O31    | N3     | 136.4(4)  |
| C10    | C11    | C12    | 116.4(5)  | Cu     | N1     | N2     | 111.7(2)  | C9     | S      | C12    | 91.4(2)   |
| C12    | C11    | C10    | 116.4(5)  | C8     | N2     | N1     | 114.6(3)  | C12    | S      | C9     | 91.4(2)   |
| H11    | C11    | C12    | 121.8     | N1     | N2     | C8     | 114.6(3)  | N1     | Cu     | O1     | 92.8(1)   |
| C12    | C11    | H11    | 121.8     | C8     | N2     | H2     | 122.7     | O1     | Cu     | N1     | 92.8(1)   |
| C11    | C12    | H12    | 123.1     | H2     | N2     | C8     | 122.7     | N1     | Cu     | O1W    | 167.8(1)  |
| H12    | C12    | C11    | 123.1     | N1     | N2     | H2     | 122.7     | O1W    | Cu     | N1     | 167.8(1)  |
| C11    | C12    | S      | 113.7(4)  | H2     | N2     | N1     | 122.7     | N1     | Cu     | O3     | 81.6(1)   |
| S      | C12    | C11    | 113.7(4)  | O31    | N3     | O32    | 119.1(4)  | O3     | Cu     | N1     | 81.6(1)   |
| H12    | C12    | S      | 123.1     | O32    | N3     | O31    | 119.1(4)  | N1     | Cu     | O31    | 98.0(1)   |
| S      | C12    | H12    | 123.1     | O31    | N3     | O33    | 123.0(5)  | O31    | Cu     | N1     | 98.0(1)   |
| H13A   | C13    | H13B   | 109.4     | O33    | N3     | O31    | 123.0(5)  | O1     | Cu     | O1W    | 92.4(1)   |
| H13B   | C13    | H13A   | 109.4     | O32    | N3     | O33    | 117.9(4)  | O1W    | Cu     | O1     | 92.4(1)   |
| H13A   | C13    | H13C   | 109.5     | O33    | N3     | O32    | 117.9(4)  | O1     | Cu     | O3     | 174.4(1)  |
| H13C   | C13    | H13A   | 109.5     | C1     | O1     | Cu     | 126.9(2)  | O3     | Cu     | O1     | 174.4(1)  |
| H13A   | C13    | O2     | 109.5     | Cu     | O1     | C1     | 126.9(2)  | O1     | Cu     | O31    | 84.2(1)   |
| O2     | C13    | H13A   | 109.5     | C2     | O2     | C13    | 118.3(3)  | O31    | Cu     | O1     | 84.2(1)   |
| H13B   | C13    | H13C   | 109.5     | C13    | O2     | C2     | 118.3(3)  | O1W    | Cu     | O3     | 93.1(1)   |
| H13C   | C13    | H13B   | 109.5     | H1A    | O1W    | H1B    | 106(4)    | O3     | Cu     | O1W    | 93.1(1)   |
| H13B   | C13    | O2     | 109.5     | H1B    | O1W    | H1A    | 106(4)    | O1W    | Cu     | O31    | 93.6(1)   |
| O2     | C13    | H13B   | 109.5     | H1A    | O1W    | Cu     | 112(3)    | O31    | Cu     | O1W    | 93.6(1)   |
| H13C   | C13    | O2     | 109.5     | Cu     | O1W    | H1A    | 112(3)    | O3     | Cu     | O31    | 96.6(1)   |

|    |     |      |          |     |     |     |          |     |     |     |         |
|----|-----|------|----------|-----|-----|-----|----------|-----|-----|-----|---------|
| O2 | C13 | H13C | 109.5    | H1B | O1W | Cu  | 115(3)   | O31 | Cu  | O3  | 96.6(1) |
| C7 | N1  | N2   | 119.7(3) | Cu  | O1W | H1B | 115(3)   | H2A | O2W | H2B | 106(5)  |
| N2 | N1  | C7   | 119.7(3) | C8  | O3  | Cu  | 111.9(2) | H2B | O2W | H2A | 106(5)  |
| C7 | N1  | Cu   | 128.3(2) | Cu  | O3  | C8  | 111.9(2) |     |     |     |         |

**Tabla S4. Experimental dihedral angles of CuHL.**

| Atom 1 | Atom 2 | Atom 3 | Atom 4 | Torsion (°) | Atom 1 | Atom 2 | Atom 3 | Atom 4 | Torsion (°) |
|--------|--------|--------|--------|-------------|--------|--------|--------|--------|-------------|
| C6     | C1     | C2     | C3     | 0.5(5)      | C4     | C3     | C2     | C1     | 0.8(5)      |
| C3     | C2     | C1     | C6     | 0.5(5)      | O2     | C2     | C3     | H3     | 0.1         |
| C6     | C1     | C2     | O2     | -178.8(3)   | H3     | C3     | C2     | O2     | 0.1         |
| O2     | C2     | C1     | C6     | -178.8(3)   | O2     | C2     | C3     | C4     | -180.0(3)   |
| O1     | C1     | C2     | C3     | -179.8(3)   | C4     | C3     | C2     | O2     | -180.0(3)   |
| C3     | C2     | C1     | O1     | -179.8(3)   | C1     | C2     | O2     | C13    | -178.5(3)   |
| O1     | C1     | C2     | O2     | 0.9(4)      | C13    | O2     | C2     | C1     | -178.5(3)   |
| O2     | C2     | C1     | O1     | 0.9(4)      | C3     | C2     | O2     | C13    | 2.2(5)      |
| C2     | C1     | C6     | C5     | -1.6(4)     | C13    | O2     | C2     | C3     | 2.2(5)      |
| C5     | C6     | C1     | C2     | -1.6(4)     | C2     | C3     | C4     | H4     | 179         |
| C2     | C1     | C6     | C7     | 178.4(3)    | H4     | C4     | C3     | C2     | 179         |
| C7     | C6     | C1     | C2     | 178.4(3)    | C2     | C3     | C4     | C5     | -1.0(5)     |
| O1     | C1     | C6     | C5     | 178.7(3)    | C5     | C4     | C3     | C2     | -1.0(5)     |
| C5     | C6     | C1     | O1     | 178.7(3)    | H3     | C3     | C4     | H4     | -1.1        |
| O1     | C1     | C6     | C7     | -1.3(5)     | H4     | C4     | C3     | H3     | -1.1        |
| C7     | C6     | C1     | O1     | -1.3(5)     | H3     | C3     | C4     | C5     | 178.9       |
| C2     | C1     | O1     | Cu     | 177.5(2)    | C5     | C4     | C3     | H3     | 178.9       |
| Cu     | O1     | C1     | C2     | 177.5(2)    | C3     | C4     | C5     | H5     | 179.9       |
| C6     | C1     | O1     | Cu     | -2.8(4)     | H5     | C5     | C4     | C3     | 179.9       |
| Cu     | O1     | C1     | C6     | -2.8(4)     | C3     | C4     | C5     | C6     | -0.1(5)     |
| C1     | C2     | C3     | H3     | -179.2      | C6     | C5     | C4     | C3     | -0.1(5)     |
| H3     | C3     | C2     | C1     | -179.2      | H4     | C4     | C5     | H5     | -0.1        |
| C1     | C2     | C3     | C4     | 0.8(5)      | H5     | C5     | C4     | H4     | -0.1        |
| H4     | C4     | C5     | C6     | 179.9       | C12    | S      | C9     | C10    | -0.3(3)     |
| C6     | C5     | C4     | H4     | 179.9       | C9     | C10    | C11    | H11    | -178.8      |
| C4     | C5     | C6     | C1     | 1.4(5)      | H11    | C11    | C10    | C9     | -178.8      |
| C1     | C6     | C5     | C4     | 1.4(5)      | C9     | C10    | C11    | C12    | 1.2(6)      |
| C4     | C5     | C6     | C7     | -178.6(3)   | C12    | C11    | C10    | C9     | 1.2(6)      |
| C7     | C6     | C5     | C4     | -178.6(3)   | H10    | C10    | C11    | H11    | 1           |
| H5     | C5     | C6     | C1     | -178.6      | H11    | C11    | C10    | H10    | 1           |
| C1     | C6     | C5     | H5     | -178.6      | H10    | C10    | C11    | C12    | -179        |
| H5     | C5     | C6     | C7     | 1.4         | C12    | C11    | C10    | H10    | -179        |
| C7     | C6     | C5     | H5     | 1.4         | C10    | C11    | C12    | H12    | 178.5       |
| C1     | C6     | C7     | H7     | 179.8       | H12    | C12    | C11    | C10    | 178.5       |
| H7     | C7     | C6     | C1     | 179.8       | C10    | C11    | C12    | S      | -1.5(7)     |
| C1     | C6     | C7     | N1     | -0.2(5)     | S      | C12    | C11    | C10    | -1.5(7)     |
| N1     | C7     | C6     | C1     | -0.2(5)     | H11    | C11    | C12    | H12    | -1          |
| C5     | C6     | C7     | H7     | -0.3        | H12    | C12    | C11    | H11    | -1          |
| H7     | C7     | C6     | C5     | -0.3        | H11    | C11    | C12    | S      | 178.5       |
| C5     | C6     | C7     | N1     | 179.7(3)    | S      | C12    | C11    | H11    | 178.5       |
| N1     | C7     | C6     | C5     | 179.7(3)    | C11    | C12    | S      | C9     | 1.0(5)      |
| C6     | C7     | N1     | N2     | 179.4(3)    | C9     | S      | C12    | C11    | 1.0(5)      |
| N2     | N1     | C7     | C6     | 179.4(3)    | H12    | C12    | S      | C9     | -179        |
| C6     | C7     | N1     | Cu     | 5.7(5)      | C9     | S      | C12    | H12    | -179        |
| Cu     | N1     | C7     | C6     | 5.7(5)      | H13A   | C13    | O2     | C2     | -59.4       |
| H7     | C7     | N1     | N2     | -0.5        | C2     | O2     | C13    | H13A   | -59.4       |
| N2     | N1     | C7     | H7     | -0.5        | H13B   | C13    | O2     | C2     | -179.3      |
| H7     | C7     | N1     | Cu     | -174.2      | C2     | O2     | C13    | H13B   | -179.3      |
| Cu     | N1     | C7     | H7     | -174.2      | H13C   | C13    | O2     | C2     | 60.7        |

|     |     |     |     |           |     |     |     |      |           |
|-----|-----|-----|-----|-----------|-----|-----|-----|------|-----------|
| N2  | C8  | C9  | C10 | 6.4(6)    | C2  | O2  | C13 | H13C | 60.7      |
| C10 | C9  | C8  | N2  | 6.4(6)    | C7  | N1  | N2  | C8   | -172.6(3) |
| N2  | C8  | C9  | S   | -174.0(3) | C8  | N2  | N1  | C7   | -172.6(3) |
| S   | C9  | C8  | N2  | -174.0(3) | C7  | N1  | N2  | H2   | 7.5       |
| O3  | C8  | C9  | C10 | -174.8(4) | H2  | N2  | N1  | C7   | 7.5       |
| C10 | C9  | C8  | O3  | -174.8(4) | Cu  | N1  | N2  | C8   | 2.1(3)    |
| O3  | C8  | C9  | S   | 4.9(5)    | C8  | N2  | N1  | Cu   | 2.1(3)    |
| S   | C9  | C8  | O3  | 4.9(5)    | Cu  | N1  | N2  | H2   | -177.8    |
| C9  | C8  | N2  | N1  | 177.3(3)  | H2  | N2  | N1  | Cu   | -177.8    |
| N1  | N2  | C8  | C9  | 177.3(3)  | C7  | N1  | Cu  | O1   | -7.4(3)   |
| C9  | C8  | N2  | H2  | -2.8      | O1  | Cu  | N1  | C7   | -7.4(3)   |
| H2  | N2  | C8  | C9  | -2.8      | C7  | N1  | Cu  | O1W  | 107.6(6)  |
| O3  | C8  | N2  | N1  | -1.6(5)   | O1W | Cu  | N1  | C7   | 107.6(6)  |
| N1  | N2  | C8  | O3  | -1.6(5)   | C7  | N1  | Cu  | O3   | 172.6(3)  |
| O3  | C8  | N2  | H2  | 178.4     | O3  | Cu  | N1  | C7   | 172.6(3)  |
| H2  | N2  | C8  | O3  | 178.4     | C7  | N1  | Cu  | O31  | -91.9(3)  |
| C9  | C8  | O3  | Cu  | -178.6(3) | O31 | Cu  | N1  | C7   | -91.9(3)  |
| Cu  | O3  | C8  | C9  | -178.6(3) | N2  | N1  | Cu  | O1   | 178.5(2)  |
| N2  | C8  | O3  | Cu  | 0.2(4)    | O1  | Cu  | N1  | N2   | 178.5(2)  |
| Cu  | O3  | C8  | N2  | 0.2(4)    | N2  | N1  | Cu  | O1W  | -66.5(6)  |
| C8  | C9  | C10 | H10 | -0.6      | O1W | Cu  | N1  | N2   | -66.5(6)  |
| H10 | C10 | C9  | C8  | -0.6      | N2  | N1  | Cu  | O3   | -1.5(2)   |
| C8  | C9  | C10 | C11 | 179.3(4)  | O3  | Cu  | N1  | N2   | -1.5(2)   |
| C11 | C10 | C9  | C8  | 179.3(4)  | N2  | N1  | Cu  | O31  | 94.0(2)   |
| S   | C9  | C10 | H10 | 179.8     | O31 | Cu  | N1  | N2   | 94.0(2)   |
| H10 | C10 | C9  | S   | 179.8     | O32 | N3  | O31 | Cu   | -113.0(5) |
| S   | C9  | C10 | C11 | -0.4(4)   | Cu  | O31 | N3  | O32  | -113.0(5) |
| C11 | C10 | C9  | S   | -0.4(4)   | O33 | N3  | O31 | Cu   | 68.8(7)   |
| C8  | C9  | S   | C12 | -180.0(3) | Cu  | O31 | N3  | O33  | 68.8(7)   |
| C12 | S   | C9  | C8  | -180.0(3) | C1  | O1  | Cu  | N1   | 5.8(2)    |
| C10 | C9  | S   | C12 | -0.3(3)   | N1  | Cu  | O1  | C1   | 5.8(2)    |
| C1  | O1  | Cu  | O1W | -163.1(2) | O3  | Cu  | O1W | H1B  | 83(4)     |
| O1W | Cu  | O1  | C1  | -163.1(2) | H1B | O1W | Cu  | O31  | -14(4)    |
| C1  | O1  | Cu  | O3  | 5(1)      | O31 | Cu  | O1W | H1B  | -14(4)    |
| O3  | Cu  | O1  | C1  | 5(1)      | C8  | O3  | Cu  | N1   | 0.8(2)    |
| C1  | O1  | Cu  | O31 | 103.5(3)  | N1  | Cu  | O3  | C8   | 0.8(2)    |
| O31 | Cu  | O1  | C1  | 103.5(3)  | C8  | O3  | Cu  | O1   | 1(1)      |
| H1A | O1W | Cu  | N1  | -92(3)    | O1  | Cu  | O3  | C8   | 1(1)      |
| N1  | Cu  | O1W | H1A | -92(3)    | C8  | O3  | Cu  | O1W  | 169.7(3)  |
| H1A | O1W | Cu  | O1  | 23(3)     | O1W | Cu  | O3  | C8   | 169.7(3)  |
| O1  | Cu  | O1W | H1A | 23(3)     | C8  | O3  | Cu  | O31  | -96.4(3)  |
| H1A | O1W | Cu  | O3  | -156(3)   | O31 | Cu  | O3  | C8   | -96.4(3)  |
| O3  | Cu  | O1W | H1A | -156(3)   | N3  | O31 | Cu  | N1   | -124.9(5) |
| H1A | O1W | Cu  | O31 | 107(3)    | N1  | Cu  | O31 | N3   | -124.9(5) |
| O31 | Cu  | O1W | H1A | 107(3)    | N3  | O31 | Cu  | O1   | 143.1(5)  |
| H1B | O1W | Cu  | N1  | 146(4)    | O1  | Cu  | O31 | N3   | 143.1(5)  |
| N1  | Cu  | O1W | H1B | 146(4)    | N3  | O31 | Cu  | O1W  | 51.0(5)   |
| H1B | O1W | Cu  | O1  | -99(4)    | O1W | Cu  | O31 | N3   | 51.0(5)   |
| O1  | Cu  | O1W | H1B | -99(4)    | N3  | O31 | Cu  | O3   | -42.5(5)  |
| H1B | O1W | Cu  | O3  | 83(4)     | O3  | Cu  | O31 | N3   | -42.5(5)  |

Table S5. Calculated bond distances of CuHL.

| Atom1 | Atom2 | Calculated Length | Atom1 | Atom2 | Calculated Length | Atom1 | Atom2 | Calculated Length |
|-------|-------|-------------------|-------|-------|-------------------|-------|-------|-------------------|
| C1    | C2    | 1.443             | C8    | C9    | 1.4557            | N1    | Cu    | 1.9567            |
| C6    | C1    | 1.4333            | C8    | N2    | 1.3538            | N3    | O31   | 1.2722            |

|    |    |        |     |     |        |     |     |        |
|----|----|--------|-----|-----|--------|-----|-----|--------|
| C1 | O1 | 1.2852 | C8  | O3  | 1.2472 | N3  | O33 | 1.2163 |
| C2 | C3 | 1.376  | C9  | C10 | 1.3783 | N3  | O32 | 1.2751 |
| C2 | O2 | 1.3531 | C9  | S   | 1.7282 | O1  | Cu  | 1.9151 |
| C3 | C4 | 1.4122 | C10 | C11 | 1.4105 | O1W | Cu  | 1.9902 |
| C4 | C5 | 1.3637 | C11 | C12 | 1.3707 | O3  | Cu  | 2.0937 |
| C5 | C6 | 1.4225 | C12 | S   | 1.7067 | O31 | Cu  | 2.2567 |
| C6 | C7 | 1.417  | C13 | O2  | 1.4159 |     |     |        |
| C7 | N1 | 1.297  | N2  | N1  | 1.374  |     |     |        |

Table S6. Calculated bond angles of CuHL.

| Atom1 | Atom2 | Atom3 | Calculated Angles | Atom1 | Atom2 | Atom3 | Calculated Angles |
|-------|-------|-------|-------------------|-------|-------|-------|-------------------|
| C6    | C1    | C2    | 116.7             | C7    | N1    | N2    | 120.22            |
| C2    | C1    | O1    | 117.79            | C7    | N1    | Cu    | 127.58            |
| C6    | C1    | O1    | 125.5             | N2    | N1    | Cu    | 112.08            |
| C1    | C2    | C3    | 120.79            | C8    | N2    | N1    | 116.62            |
| C1    | C2    | O2    | 114.03            | O33   | N3    | O31   | 120.73            |
| C3    | C2    | O2    | 125.18            | O32   | N3    | O31   | 118.74            |
| C2    | C3    | C4    | 121.37            | O33   | N3    | O32   | 120.53            |
| C3    | C4    | C5    | 119.78            | C1    | O1    | Cu    | 128.13            |
| C4    | C5    | C6    | 120.79            | C13   | O2    | C2    | 118.51            |
| C5    | C6    | C1    | 120.56            | C8    | O3    | Cu    | 110.72            |
| C1    | C6    | C7    | 121.91            | N3    | O31   | Cu    | 127.01            |
| C5    | C6    | C7    | 117.53            | C12   | S     | C9    | 91.49             |
| C6    | C7    | N1    | 124.69            | N1    | Cu    | O1    | 91.11             |
| C9    | C8    | N2    | 118.4             | N1    | Cu    | O1W   | 172.96            |
| C9    | C8    | O3    | 121.96            | N1    | Cu    | O3    | 79.44             |
| N2    | C8    | O3    | 119.63            | N1    | Cu    | O31   | 92.3              |
| C8    | C9    | C10   | 130.37            | O1    | Cu    | O1W   | 94.49             |
| C8    | C9    | S     | 118.51            | O3    | Cu    | O1    | 161.81            |
| C10   | C9    | S     | 111.12            | O31   | Cu    | O1    | 106.86            |
| C9    | C10   | C11   | 112.75            | O1W   | Cu    | O3    | 94.01             |
| C10   | C11   | C12   | 112.15            | O1W   | Cu    | O31   | 90.16             |
| C11   | C12   | S     | 112.49            | O3    | Cu    | O31   | 89.17             |

Table S7. Calculated dihedral angles of CuHL.

| Atom1 | Atom2 | Atom3 | Atom4 | Calculated Torsion | Atom1 | Atom2 | Atom3 | Atom4 | Calculated Torsion |
|-------|-------|-------|-------|--------------------|-------|-------|-------|-------|--------------------|
| C6    | C1    | C2    | C3    | -0.55              | S     | C9    | C10   | C11   | -0.2               |
| C6    | C1    | C2    | O2    | 179.72             | C8    | C9    | S     | C12   | -179.96            |
| O1    | C1    | C2    | C3    | 179.74             | C10   | C9    | S     | C12   | 0.21               |
| O1    | C1    | C2    | O2    | 0.01               | C12   | C11   | C10   | C9    | 0.08               |
| C2    | C1    | C6    | C5    | 0.42               | C10   | C11   | C12   | S     | 0.08               |
| C7    | C6    | C1    | C2    | -178.47            | C11   | C12   | S     | C9    | -0.16              |
| O1    | C1    | C6    | C5    | -179.89            | C8    | N2    | N1    | C7    | -175.55            |

|     |     |    |     |         |     |     |     |     |         |
|-----|-----|----|-----|---------|-----|-----|-----|-----|---------|
| O1  | C1  | C6 | C7  | 1.22    | Cu  | N1  | N2  | C8  | 8.28    |
| C2  | C1  | O1 | Cu  | -172.92 | C7  | N1  | Cu  | O1  | 10.02   |
| C6  | C1  | O1 | Cu  | 7.4     | C7  | N1  | Cu  | O1W | 152.74  |
| C1  | C2  | C3 | C4  | 0.32    | C7  | N1  | Cu  | O3  | 174.38  |
| O2  | C2  | C3 | C4  | -179.99 | C7  | N1  | Cu  | O31 | -96.9   |
| C1  | C2  | O2 | C13 | 178.26  | N2  | N1  | Cu  | O1  | -174.15 |
| C3  | C2  | O2 | C13 | -1.46   | N2  | N1  | Cu  | O1W | -31.43  |
| C2  | C3  | C4 | C5  | 0.08    | N2  | N1  | Cu  | O3  | -9.8    |
| C6  | C5  | C4 | C3  | -0.22   | N2  | N1  | Cu  | O31 | 78.93   |
| C1  | C6  | C5 | C4  | -0.05   | O33 | N3  | O31 | Cu  | -176.38 |
| C7  | C6  | C5 | C4  | 178.89  | O32 | N3  | O31 | Cu  | 3.74    |
| C1  | C6  | C7 | N1  | -1.99   | C1  | O1  | Cu  | N1  | -10.83  |
| C5  | C6  | C7 | N1  | 179.09  | C1  | O1  | Cu  | O1W | 173.44  |
| C6  | C7  | N1 | N2  | 178.8   | C1  | O1  | Cu  | O3  | -68.94  |
| C6  | C7  | N1 | Cu  | -5.68   | C1  | O1  | Cu  | O31 | 81.91   |
| N2  | C8  | C9 | C10 | -9.95   | C8  | O3  | Cu  | N1  | 10.73   |
| N2  | C8  | C9 | S   | 170.25  | C8  | O3  | Cu  | O1  | 70.45   |
| O3  | C8  | C9 | C10 | 169.58  | C8  | O3  | Cu  | O1W | -171.86 |
| O3  | C8  | C9 | S   | -10.22  | C8  | O3  | Cu  | O31 | -81.76  |
| C9  | C8  | N2 | N1  | -179.03 | N3  | O31 | Cu  | N1  | 175.52  |
| O3  | C8  | N2 | N1  | 1.43    | N3  | O31 | Cu  | O1  | 83.66   |
| C9  | C8  | O3 | Cu  | 170.83  | N3  | O31 | Cu  | O1W | -11.08  |
| N2  | C8  | O3 | Cu  | -9.64   | N3  | O31 | Cu  | O3  | -105.09 |
| C11 | C10 | C9 | C8  | 179.99  |     |     |     |     |         |

Table S8. Assignment of the vibrational spectra of CuHL and H<sub>2</sub>L ligand.

| H <sub>2</sub> L      |                    |               |                                                                           | CuHL                  |                    |              |                                                                        |
|-----------------------|--------------------|---------------|---------------------------------------------------------------------------|-----------------------|--------------------|--------------|------------------------------------------------------------------------|
| IR                    | Raman              | Calc.         | Assignments                                                               | IR                    | Raman              | Calc.        | Assignments                                                            |
| 3553 <sup>s</sup>     |                    |               | [v <sub>as</sub> OH] <sup>H<sub>2</sub>O crist.</sup>                     | 3429 <sup>sh</sup>    |                    |              | [v <sub>as</sub> OH] <sup>H<sub>2</sub>O crist.</sup>                  |
| 3345 <sup>m</sup>     |                    |               | [v <sub>s</sub> OH] <sup>H<sub>2</sub>O crist.</sup>                      | 3348 <sup>s,b</sup>   |                    | 3876         | [v <sub>as</sub> OH] <sup>H<sub>2</sub>O coord.</sup>                  |
|                       |                    |               |                                                                           | 3222 <sup>sh</sup>    |                    | 2496         | [v <sub>s</sub> OH] <sup>H<sub>2</sub>O crist.</sup>                   |
| 3219 <sup>m,b</sup>   |                    | 3518          | vNH                                                                       |                       |                    | 3605         | [v(O)H...O(NO <sub>2</sub> )] <sup>H<sub>2</sub>O coord.</sup>         |
| 3180 <sup>sh</sup>    |                    | 3241          | [vCH ip] <sup>TPNNH</sup>                                                 |                       |                    | 3265         | vNH                                                                    |
| 3097 <sup>w</sup>     | 3099 <sup>vw</sup> | 3212          | [vCH op] <sup>TPNNH</sup>                                                 | 3104 <sup>w</sup>     | 3104 <sup>vw</sup> | 3241         | [vCH ip] <sup>TPNNH</sup>                                              |
| 3086 <sup>m</sup>     |                    | 3191          | [vCH op] <sup>TPNNH</sup>                                                 | 3082 <sup>vw</sup>    | 3071 <sup>w</sup>  | 3217         | [vCH op] <sup>TPNNH</sup>                                              |
| 3078 <sup>sh</sup>    |                    | 3209          | [vCH ip] <sup>o-HVA</sup>                                                 |                       |                    | 3223         | [vCH op] <sup>TPNNH</sup>                                              |
| 3054 <sup>sh</sup>    |                    | 3189          | [vCH op] <sup>o-HVA</sup>                                                 | 3056 <sup>vw</sup>    |                    | 3208         | [vCH ip] <sup>o-VA</sup>                                               |
|                       |                    | 3166          |                                                                           |                       |                    | 3182         | [vCH op] <sup>o-VA</sup>                                               |
| 3033 <sup>sh</sup>    |                    | 3131          | [v <sub>as</sub> CH] <sup>CH<sub>3</sub></sup>                            | 3032 <sup>sh</sup>    |                    | 3154         | [v <sub>as</sub> CH] <sup>CH<sub>3</sub></sup>                         |
| 3019 <sup>m-w,b</sup> |                    |               |                                                                           | 3010 <sup>sh</sup>    | 3008 <sup>vw</sup> |              |                                                                        |
| 2995 <sup>m-w</sup>   |                    | 3394          | vOH                                                                       |                       |                    |              |                                                                        |
| 2975 <sup>sh</sup>    |                    | 3052          | [v <sub>as</sub> CH] <sup>CH<sub>3</sub></sup>                            | 2964 <sup>vw</sup>    |                    | 3074         | [v <sub>as</sub> CH] <sup>CH<sub>3</sub></sup>                         |
| 2940 <sup>w</sup>     |                    | 3030          | [vCH] <sup>aldh</sup>                                                     | 2933 <sup>w</sup>     |                    | 3099         | [vCH] <sup>aldh</sup>                                                  |
| 2867 <sup>w</sup>     |                    | 2999          | [v <sub>s</sub> CH] <sup>CH<sub>3</sub></sup>                             |                       |                    | 3012         | [v <sub>s</sub> CH] <sup>CH<sub>3</sub></sup>                          |
| 2840 <sup>vw</sup>    |                    |               | [vCH] <sup>aldh</sup>                                                     | 2839 <sup>w</sup>     |                    |              | [vCH] <sup>aldh</sup>                                                  |
|                       |                    |               |                                                                           | 1656 <sup>sh</sup>    |                    | 1690         | δH <sub>2</sub> O                                                      |
| 1640 <sup>vs</sup>    | 1646 <sup>w</sup>  | 1737          | [vC=O] <sup>TPNNH</sup> + δNH                                             |                       |                    | 1694         | vC=O + vC=N                                                            |
| 1605 <sup>s</sup>     | 1603 <sup>vs</sup> | 1669          | vC=N                                                                      | 1606 <sup>vs, b</sup> | 1618 <sup>vs</sup> | 1655         | vC=N + vC=O + δH <sub>2</sub> O                                        |
| 1582 <sup>s, b</sup>  | 1577 <sup>vs</sup> | 1650          | [v <sup>R</sup> ] <sup>o-HVA</sup> + δOH                                  | 1561 <sup>s</sup>     | 1565 <sup>w</sup>  | 1669/1601    | [v <sup>R</sup> ] <sup>o-VA</sup> + δNH + δH <sub>2</sub> O            |
|                       |                    | 1610          |                                                                           |                       |                    | 1604         |                                                                        |
| 1550 <sup>sh</sup>    |                    | 1561          | δNH + [vC=Cop] <sup>TPNNH</sup>                                           | 1544 <sup>m</sup>     | 1540 <sup>s</sup>  | 1597/1559    | δNH + [vC=C op] <sup>TPNNH</sup>                                       |
|                       |                    | 1548          | δNH + vC-N + [vC=C] <sup>TPNNH</sup>                                      |                       |                    |              |                                                                        |
| 1517 <sup>vw</sup>    |                    | 1512          | δNH + δ <sub>s</sub> CH <sub>3</sub> + [δCH] <sup>o-HVA</sup> + δOH       | 1503 <sup>w</sup>     |                    | 1506         | δ <sub>s</sub> CH <sub>3</sub> + [δCH] <sup>o-VA</sup> + δNH           |
| 1475 <sup>s,b</sup>   | 1479 <sup>m</sup>  | 1505          | δ <sub>as</sub> CH <sub>3</sub>                                           | 1466 <sup>w</sup>     | 1469 <sup>w</sup>  | 1497         | δ <sub>as</sub> CH <sub>3</sub>                                        |
|                       | 1473 <sup>sh</sup> | 1493          | δ <sub>as</sub> CH <sub>3</sub>                                           |                       |                    | 1486         | δ <sub>as</sub> CH <sub>3</sub>                                        |
| 1439 <sup>vw</sup>    |                    | 1491          | δ <sub>s</sub> CH <sub>3</sub> + [v <sup>R</sup> ] <sup>o-HVA</sup> + δOH | 1445 <sup>sh</sup>    | 1449 <sup>s</sup>  | 1482         | δ <sub>s</sub> CH <sub>3</sub> + [v <sup>R</sup> ] <sup>o-VA</sup>     |
|                       |                    | 1478          | δ <sub>s</sub> CH <sub>3</sub>                                            | 1434 <sup>w</sup>     | 1438 <sup>s</sup>  | 1474         | δ <sub>s</sub> CH <sub>3</sub>                                         |
| 1416 <sup>m</sup>     | 1421 <sup>vs</sup> | 1452          | [v <sup>R</sup> ] <sup>TPNNH</sup>                                        | 1415 <sup>m</sup>     | 1421 <sup>vs</sup> | 1469         | [v <sup>R</sup> ] <sup>TPNNH</sup> + δ <sub>s</sub> CH <sub>3</sub>    |
|                       |                    |               |                                                                           | 1384 <sup>vs</sup>    |                    | 1354         | v <sub>as</sub> NO <sub>3</sub>                                        |
|                       |                    |               |                                                                           |                       |                    | 1429         | [v <sup>R</sup> ] <sup>o-VA</sup> + δ <sub>s</sub> CH <sub>3</sub>     |
| 1369 <sup>m</sup>     |                    | 1432          | δOH + [v <sup>R</sup> ] <sup>o-HVA</sup>                                  |                       |                    |              |                                                                        |
|                       |                    | 1388          | [vCH] <sup>aldh</sup> + [vC=C+δCH] <sup>TPNNH</sup>                       |                       |                    |              |                                                                        |
| 1356 <sup>m</sup>     | 1357 <sup>m</sup>  | 1382          | [v <sup>R</sup> +CH] <sup>TPNNH</sup> + [δCH] <sup>aldh</sup>             | 1360 <sup>sh</sup>    | 1356 <sup>s</sup>  | 1401/1390    | [v <sup>R</sup> +δCH] <sup>TPNNH</sup> + [δCH] <sup>aldh</sup>         |
|                       |                    |               |                                                                           | 1352 <sup>sh</sup>    |                    |              |                                                                        |
|                       |                    | 1361          | [v <sup>R</sup> ] <sup>o-HVA</sup> + δOH + [δCH] <sup>aldh</sup>          |                       |                    |              |                                                                        |
| 1320 <sup>sh</sup>    |                    | 1308          | vAr-OH + [δCH] <sup>o-HVA</sup> + [δCH] <sup>aldh</sup>                   | 1317 <sup>sh</sup>    |                    | 1384         | vAr-O + [v <sup>R</sup> + δCH] <sup>o-VA</sup> + [δCH] <sup>aldh</sup> |
| 1306 <sup>s, b</sup>  | 1306 <sup>s</sup>  | 1269          | [δCH] <sup>TPNNH</sup>                                                    | 1334 <sup>m-w</sup>   | 1340 <sup>m</sup>  | 1265         | [δCH] <sup>TPNNH</sup>                                                 |
|                       |                    |               |                                                                           |                       |                    | 1313         | δNH + v(S)C-C(O)                                                       |
| 1264 <sup>sh</sup>    | 1266 <sup>w</sup>  | 1282          | vC-OCH <sub>3</sub> + δOH + δNH                                           | 1244 <sup>m</sup>     |                    | 1300         | vC-OCH <sub>3</sub> + [δCH] <sup>o-VA</sup>                            |
| 1251 <sup>vs,b</sup>  |                    |               |                                                                           |                       |                    |              |                                                                        |
|                       | 1233 <sup>m</sup>  | 1252          | δNH + vC-N + vC-S                                                         |                       |                    |              |                                                                        |
| 1229 <sup>sh</sup>    | 1229 <sup>sh</sup> | 1249          | [δCH] <sup>o-HVA</sup> + [δCH + vC-C] <sup>aldh</sup>                     | 1215 <sup>vs</sup>    | 1219 <sup>w</sup>  | 1254         | [δCH] <sup>o-VA</sup> + [δCH + vC-C] <sup>aldh</sup>                   |
| 1189 <sup>vw</sup>    |                    | 1213/<br>1196 | ρ <sub>r</sub> CH <sub>3</sub> + [δCH] <sup>o-HVA</sup>                   | 1198 <sup>sh</sup>    |                    | 1217<br>1198 | ρ <sub>r</sub> CH <sub>3</sub> + [δCH] <sup>o-VA</sup>                 |
| 1172 <sup>vw</sup>    |                    | 1172          | ρ <sub>r</sub> CH <sub>3</sub>                                            | 1176 <sup>vw</sup>    | 1180 <sup>w</sup>  | 1174         | ρ <sub>r</sub> CH <sub>3</sub>                                         |
| 1146 <sup>m</sup>     | 1146 <sup>m</sup>  | 1168          | vN-N                                                                      | 1145 <sup>w</sup>     | 1152 <sup>m</sup>  | 1189         | vN-N                                                                   |

|                                         |                   |                                                                                                           |                    |                    |            |                                                                                                                                    |
|-----------------------------------------|-------------------|-----------------------------------------------------------------------------------------------------------|--------------------|--------------------|------------|------------------------------------------------------------------------------------------------------------------------------------|
| 1106 <sup>w</sup>                       | 1109              | [ $\delta$ CH] <sup>o-HVA</sup> + TPNNH                                                                   | 1119 <sup>sh</sup> | 1125 <sup>vw</sup> | 1123       | [ $\delta$ CH] <sup>o-VA</sup> + TPNNH                                                                                             |
| 1098 <sup>sh</sup>                      | 1106              | [ $\delta$ CH] <sup>o-HVA</sup> + TPNNH                                                                   |                    |                    | 1109       | [ $\delta$ CH] <sup>o-VA</sup> + TPNNH                                                                                             |
| 1078 <sup>m</sup>                       | 1083 <sup>w</sup> | 1131 $\nu$ O-CH <sub>3</sub> + [ $\delta^R$ ] <sup>o-HVA</sup>                                            | 1088 <sup>sh</sup> | 1090 <sup>sh</sup> | 1160       | $\nu$ O-CH <sub>3</sub> + [ $\delta^R$ ] <sup>o-VA</sup>                                                                           |
| 1068 <sup>m</sup>                       | 1087              | [ $\nu$ C-C] <sup>TPNNH</sup>                                                                             | 1075 <sup>w</sup>  | 1074 <sup>w</sup>  | 1101       | [ $\delta$ CH + $\nu$ C-C] <sup>TPNNH</sup>                                                                                        |
|                                         |                   |                                                                                                           | 1054 <sup>vw</sup> |                    | 1117       | $\nu_s$ NO <sub>3</sub>                                                                                                            |
| 1044 <sup>w</sup>                       | 1051              | [ $\nu$ C-N + $\nu$ (C)C-S + $\delta$ C-H] <sup>TPNNH</sup>                                               | 1042 <sup>vw</sup> |                    | 1079       | [ $\nu$ C-N + $\nu$ (C)C-S + $\delta$ C-H] <sup>TPNNH</sup>                                                                        |
| 964 <sup>m</sup>                        | 965 <sup>w</sup>  | 984 $\nu$ O-CH <sub>3</sub> + [ $\delta^R$ ] <sup>o-HVA</sup>                                             | 970 <sup>m</sup>   | 980 <sup>vw</sup>  | 1019       | $\nu$ O-CH <sub>3</sub> + [ $\delta^R$ ] <sup>o-VA</sup>                                                                           |
| 952 <sup>sh</sup>                       | 967               | [ $\gamma$ CH] <sup>aldh</sup>                                                                            | 960 <sup>sh</sup>  |                    | 967        | [ $\gamma$ CH] <sup>aldh</sup>                                                                                                     |
| 932 <sup>vw</sup>                       | 909 <sup>w</sup>  | [ $\gamma$ CH] <sup>TPNNH</sup>                                                                           |                    |                    | 930        | [ $\gamma$ CH] <sup>TPNNH</sup>                                                                                                    |
| 881 <sup>vw</sup>                       | 912               | [ $\gamma$ CH] <sup>o-HVA</sup>                                                                           | 876 <sup>vw</sup>  |                    | 917        | [ $\gamma$ CH] <sup>o-VA</sup>                                                                                                     |
| 869 <sup>sh</sup>                       | 882               | $\nu$ (H)C-S                                                                                              | 864 <sup>sh</sup>  |                    | 900        | $\nu$ (H)C-S                                                                                                                       |
| 864 <sup>w</sup>                        | 844               | [ $\gamma$ CH] <sup>TPNNH</sup>                                                                           | 853 <sup>m</sup>   | 859 <sup>w</sup>   | 860        | [ $\gamma$ CH] <sup>TPNNH</sup>                                                                                                    |
| 841 <sup>m</sup>                        | 843 <sup>w</sup>  | $\gamma$ OH                                                                                               |                    |                    |            |                                                                                                                                    |
| 803 <sup>sh</sup> /<br>780 <sup>m</sup> | 872<br>773        | [ $\gamma$ CH] <sup>o-HVA</sup> + [ $\gamma$ CH] <sup>aldh</sup><br>[ $\gamma$ (CH + R)] <sup>o-HVA</sup> | 782 <sup>vw</sup>  |                    | 794        | [ $\gamma$ (CH + R)] <sup>o-VA</sup> + [ $\gamma$ CH] <sup>aldh</sup>                                                              |
| 755 <sup>vw</sup>                       | 740               | $\gamma$ C=O + [ $\gamma$ CH] <sup>o-HVA</sup> + TPNNH + $\gamma$ OH                                      | 757 <sup>w</sup>   | 763 <sup>w</sup>   | 749        | $\gamma$ C=O + [ $\gamma$ CH] <sup>TPNNH</sup>                                                                                     |
| 733 <sup>vs</sup>                       | 733               | [ $\gamma$ CH] <sup>o-HVA</sup> + $\gamma$ OH                                                             | 741 <sup>m</sup>   | 748 <sup>w</sup>   | 743        | [ $\gamma$ CH] <sup>o-VA</sup>                                                                                                     |
| 722 <sup>sh</sup>                       | 744               | [ $\delta^R$ ] <sup>o-HVA</sup>                                                                           | 721 <sup>sh</sup>  |                    | 762        | [ $\delta^R$ ] <sup>o-VA</sup>                                                                                                     |
| 661 <sup>vw</sup>                       | 663 <sup>w</sup>  | [ $\delta^R$ ] <sup>TPNNH</sup>                                                                           | 672 <sup>w</sup>   | 672 <sup>w</sup>   | 683        | [ $\delta^R$ ] <sup>TPNNH</sup>                                                                                                    |
| 629 <sup>vw</sup>                       | 640               | [ $\delta^R$ ] <sup>o-HVA</sup>                                                                           |                    | 627 <sup>w</sup>   | 645        | [ $\delta^R$ ] <sup>o-VA</sup> + [ $\delta^R$ ] <sup>coord</sup>                                                                   |
| 567 <sup>vw</sup>                       | 570 <sup>w</sup>  | [ $\gamma^R$ ] <sup>TPNNH</sup>                                                                           | 580 <sup>vw</sup>  | 577 <sup>w</sup>   | 587        | [ $\gamma^R$ ] <sup>TPNNH</sup>                                                                                                    |
|                                         |                   |                                                                                                           | 541 <sup>w</sup>   | 544 <sup>vw</sup>  | 569<br>527 | $\nu_s$ O-Cu + [ $\delta^R$ ] <sup>o-VA</sup> + $\delta$ Ar-O-CH <sub>3</sub><br>$\nu_{as}$ O-Cu + [ $\delta^R$ ] <sup>TPNNH</sup> |
| 478 <sup>vw</sup>                       | 483 <sup>vw</sup> | 456/<br>428 $\gamma$ NH                                                                                   | 494 <sup>vw</sup>  |                    | 472        | [ $\gamma^R$ ] <sup>TPNNH</sup> + $\gamma$ NH                                                                                      |
|                                         |                   |                                                                                                           | 463 <sup>h</sup>   |                    | 435        | $\nu$ (H <sub>2</sub> O)O-Cu                                                                                                       |
|                                         |                   |                                                                                                           | 456 <sup>w</sup>   | 459 <sup>vw</sup>  | 503        | $\nu$ N-Cu                                                                                                                         |

**References:** R: ring; CH<sup>aldh</sup>: C-H group originally of the aldehyde group of o-HVA; coord.: coordination ring;  $\nu$ : stretching;  $\delta$ : in-plane deformation;  $\gamma$ : out-of-plane deformation. Intensity of experimental bands vs: very strong; s: strong; m: medium; w: weak; vw: very weak; m-w: medium-weak; m-s: medium-strong; b: broad; sh: shoulder.

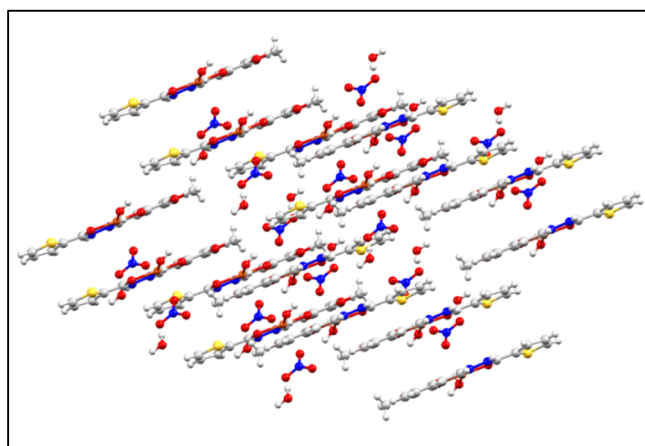

Figure S1. Drawings of CuHL showing crystal packing.

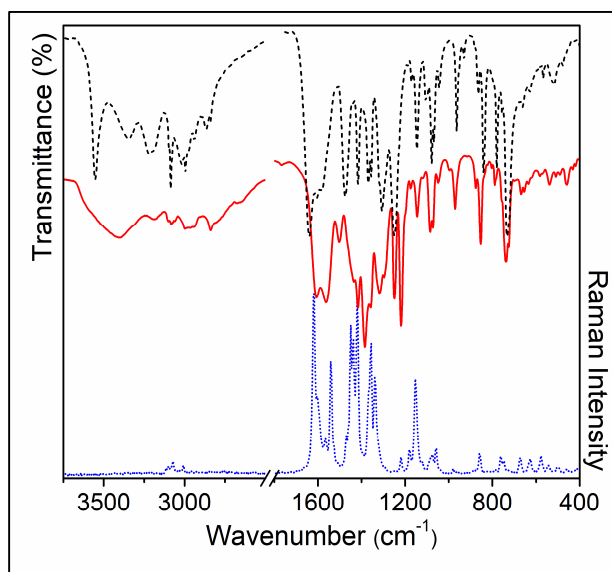

**Figure S2.** FTIR (—) and Raman (....) spectra of CuHL. FTIR spectrum of H2L (---) is included for comparison.

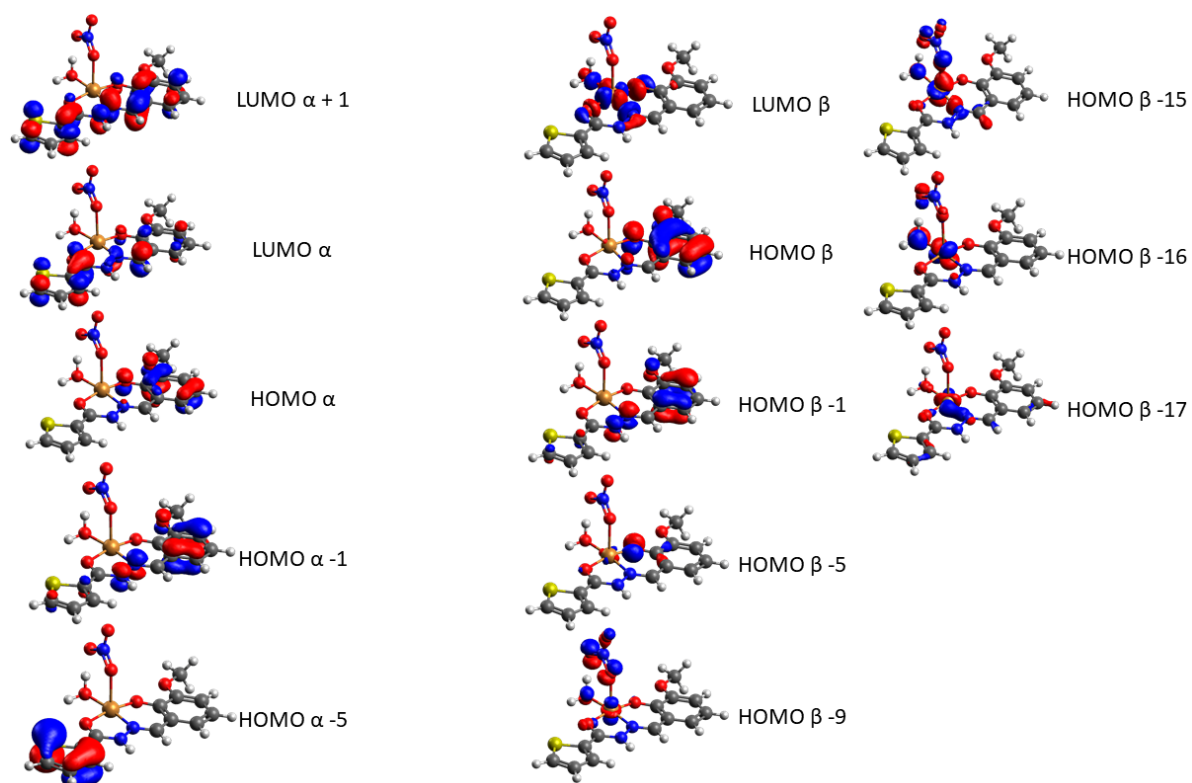

**Figure S3.** Representation of OM's involved in the electronic transitions of CuHL.
